# Supplementary material for: Changing practice in the assessment and treatment of somatosensory loss in stroke survivors: protocol for a knowledge translation study
Source: BMC Health Serv Res. 2018 Jan 23;18:34. doi: 10.1186/s12913-018-2829-z (PMC5781331; doi:10.1186/s12913-018-2829-z)
Supplement: Additional file 1: — SENSe therapy equipment. (PDF 247 kb) [file 12913_2018_2829_MOESM1_ESM.pdf]

**Additional File 1: SENSE Therapy Equipment** (L-R: texture grids, proprioceptive box and tactile object recognition poster)

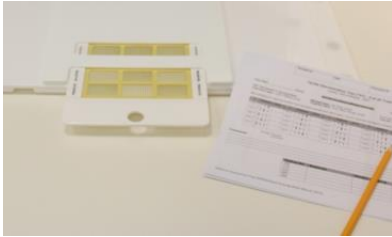

**Tactile Discrimination Test**  
(Carey, Oke, & Matyas, 1997)

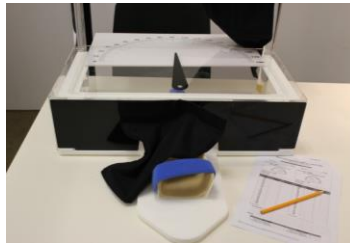

**Wrist Position Sense Test**  
(Carey, Oke, & Matyas, 1996)

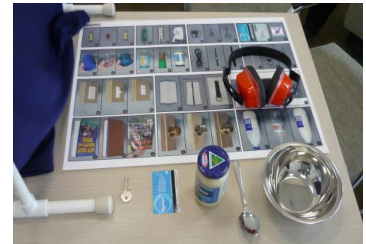

**Functional Tactile Object Recognition Test**  
(Carey, Nankervis, LeBlanc, & Harvey, 2006)
